# Supplementary material for: Multi-Objective Scheduling of Fuel Treatments to Implement a Linear Fuel Break Network
Source: MDPI journal article supplement (doi:10.3390/fire6010001), 2022-12-20
Supplement: s1 [file s1]

Archive with 2 entries (2 files):
- Appendix A.html
- Appendix B.pdf
