# Supplementary figures and images for: Multi-Objective Scheduling of Fuel Treatments to Implement a Linear Fuel Break Network
Source: MDPI journal article supplement (doi:10.3390/fire6010001), 2022-12-20

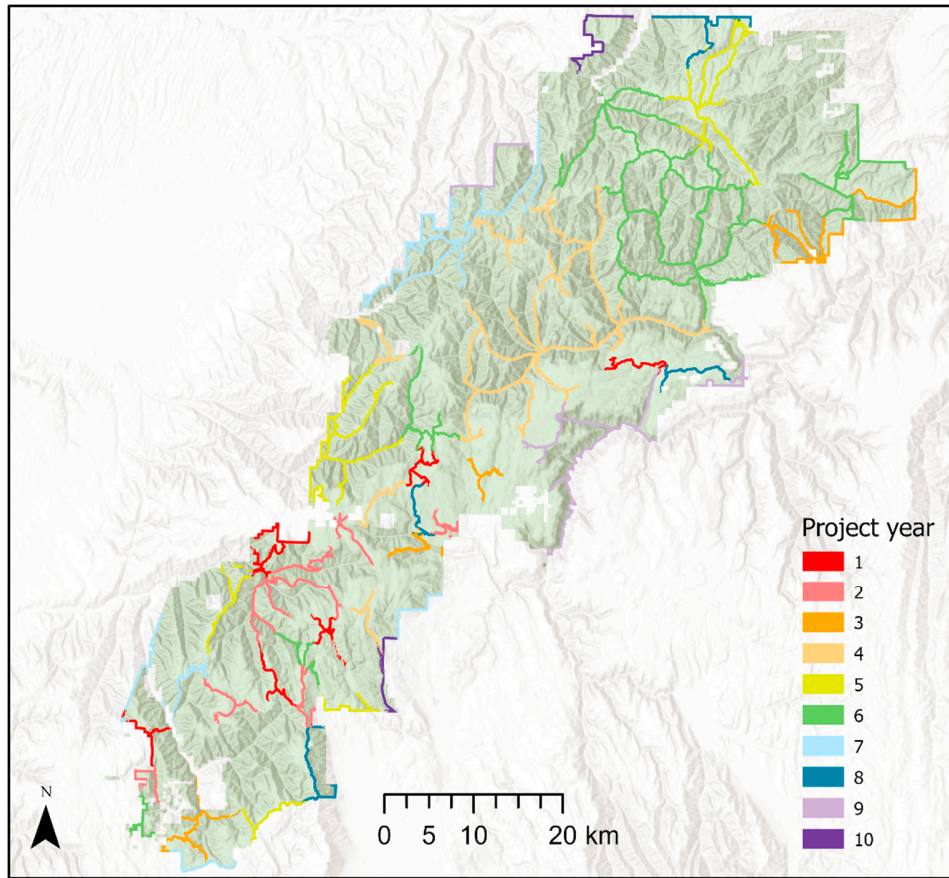

Figure S2. Our assessment of the space-time sequence of the optimized fuel break.

Supplement: s1 [file s1]
